# Supplementary material for: Single-cell RNA Sequencing Defines Prognostic Subtypes and Identifies AIF1L as a Therapeutic Target in Colorectal Cancer
Source: Research Square preprint supplement (doi:10.21203/rs.3.rs-7271791/v1), 2025-08-17
Supplement: Supplementary file 1 [file 0fd5f50a7636dd2009529798.xlsx]

## Sheet: Supplementary Table S1
Supplementary Table S1：Overview of patient information.
Patient	Class	Sample
GSM5688706_WGC	Tumor	GSM5688706_WGC
GSM5688707_JCA	Tumor	GSM5688707_JCA
GSM5688708_LS-CRC3	Tumor	GSM5688708_LS-CRC3
GSM5688709_RS-CRC1	Tumor	GSM5688709_RS-CRC1
GSM5688710_R_CRC3	Tumor	GSM5688710_R_CRC3
GSM5688711_R_CRC4	Tumor	GSM5688711_R_CRC4
SMC01	Normal	SMC01-N
SMC01	Tumor	SMC01-T
SMC02	Normal	SMC02-N
SMC02	Tumor	SMC02-T
SMC03	Normal	SMC03-N
SMC03	Tumor	SMC03-T
SMC04	Normal	SMC04-N
SMC04	Tumor	SMC04-T
SMC05	Normal	SMC05-N
SMC05	Tumor	SMC05-T
SMC06	Normal	SMC06-N
SMC06	Tumor	SMC06-T
SMC07	Normal	SMC07-N
SMC07	Tumor	SMC07-T
SMC08	Normal	SMC08-N
SMC08	Tumor	SMC08-T
SMC09	Normal	SMC09-N
SMC09	Tumor	SMC09-T
SMC10	Normal	SMC10-N
SMC10	Tumor	SMC10-T
SMC11	Tumor	SMC11-T
SMC14	Tumor	SMC14-T
SMC15	Tumor	SMC15-T
SMC16	Tumor	SMC16-T
SMC17	Tumor	SMC17-T
SMC18	Tumor	SMC18-T
SMC19	Tumor	SMC19-T
SMC20	Tumor	SMC20-T
SMC21	Tumor	SMC21-T
SMC22	Tumor	SMC22-T
SMC23	Tumor	SMC23-T
SMC24	Tumor	SMC24-T
SMC25	Tumor	SMC25-T
